# Supplementary material for: Corrigendum to “Perillaldehyde Inhibits AHR Signaling and Activates NRF2 Antioxidant Pathway in Human Keratinocytes”
Source: Hindawi journal article supplement (doi:10.1155/2018/6091947), 2018-01-01

S3

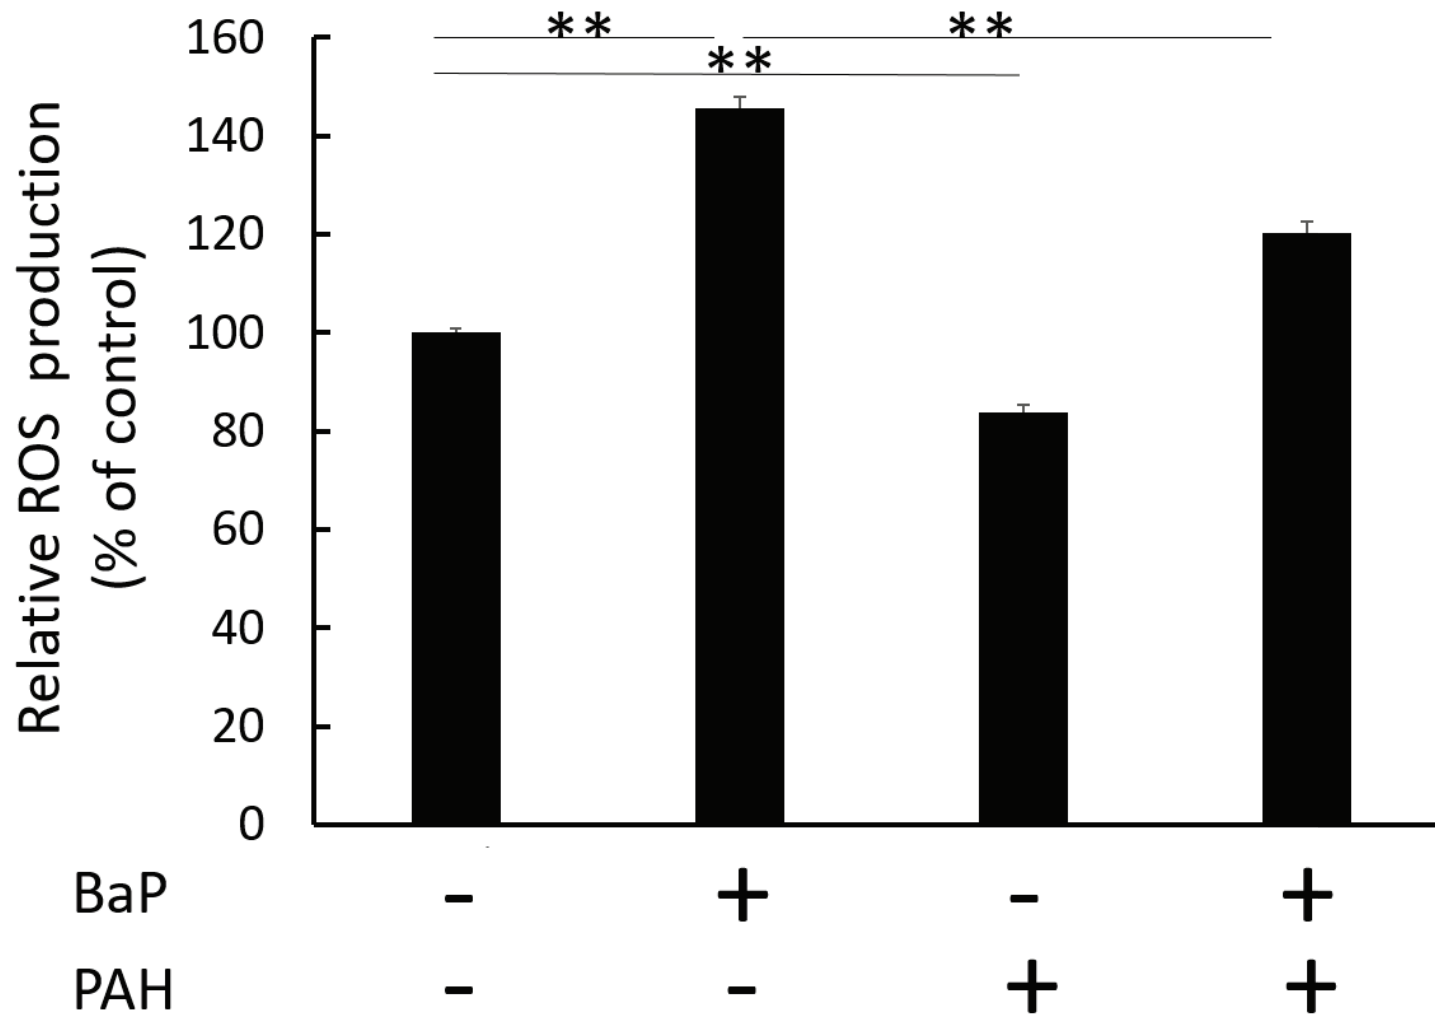

Supplement: f1 [file 6091947.f1.pdf]
